# Supplementary material for: Neuroprotective Effects of CGP3466B on Apoptosis Are Modulated by Protein-L-isoaspartate (D-aspartate) O-methyltransferase/Mst1 Pathways after Traumatic Brain Injury in Rats
Source: PubMed Central journal article supplement (PMC5569064; doi:10.1038/s41598-017-08196-3), 2017-08-23

# **Neuroprotective Effects of CGP3466B on Apoptosis Are Modulated by Protein-L-isoaspartate (D-aspartate) O-methyltransferase/Mst1 Pathways after Traumatic Brain Injury in Rats**

**Feng Liang<sup>1\*</sup>, Ligen Shi<sup>1\*</sup>, Jingwei Zheng<sup>1</sup>, Sheng Chen<sup>1</sup>, Yangxin Wang<sup>2</sup>, Jianmin Zhang<sup>1</sup>**

1Department of Neurosurgery, Second Affiliated Hospital, School of Medicine, Zhejiang University, Hangzhou 310009, China

2 Department of Orthopaedics, Second Affiliated Hospital, School of Medicine, Zhejiang University, Hangzhou 310009, China

\*The first two authors contributed equally to this work

Correspondence author: Jianmin Zhang, Email: [zjm135@vip.sina.com](mailto:zjm135@vip.sina.com), Tel: +860571-86095135

Effects of CGP3466B and chelerythrine on neurological function and brain edema in sham rats. (a) Quantification of the mNSS. (b) Quantification of the brain water content. n=6 rats per group. \* $P < 0.05$  vs sham.

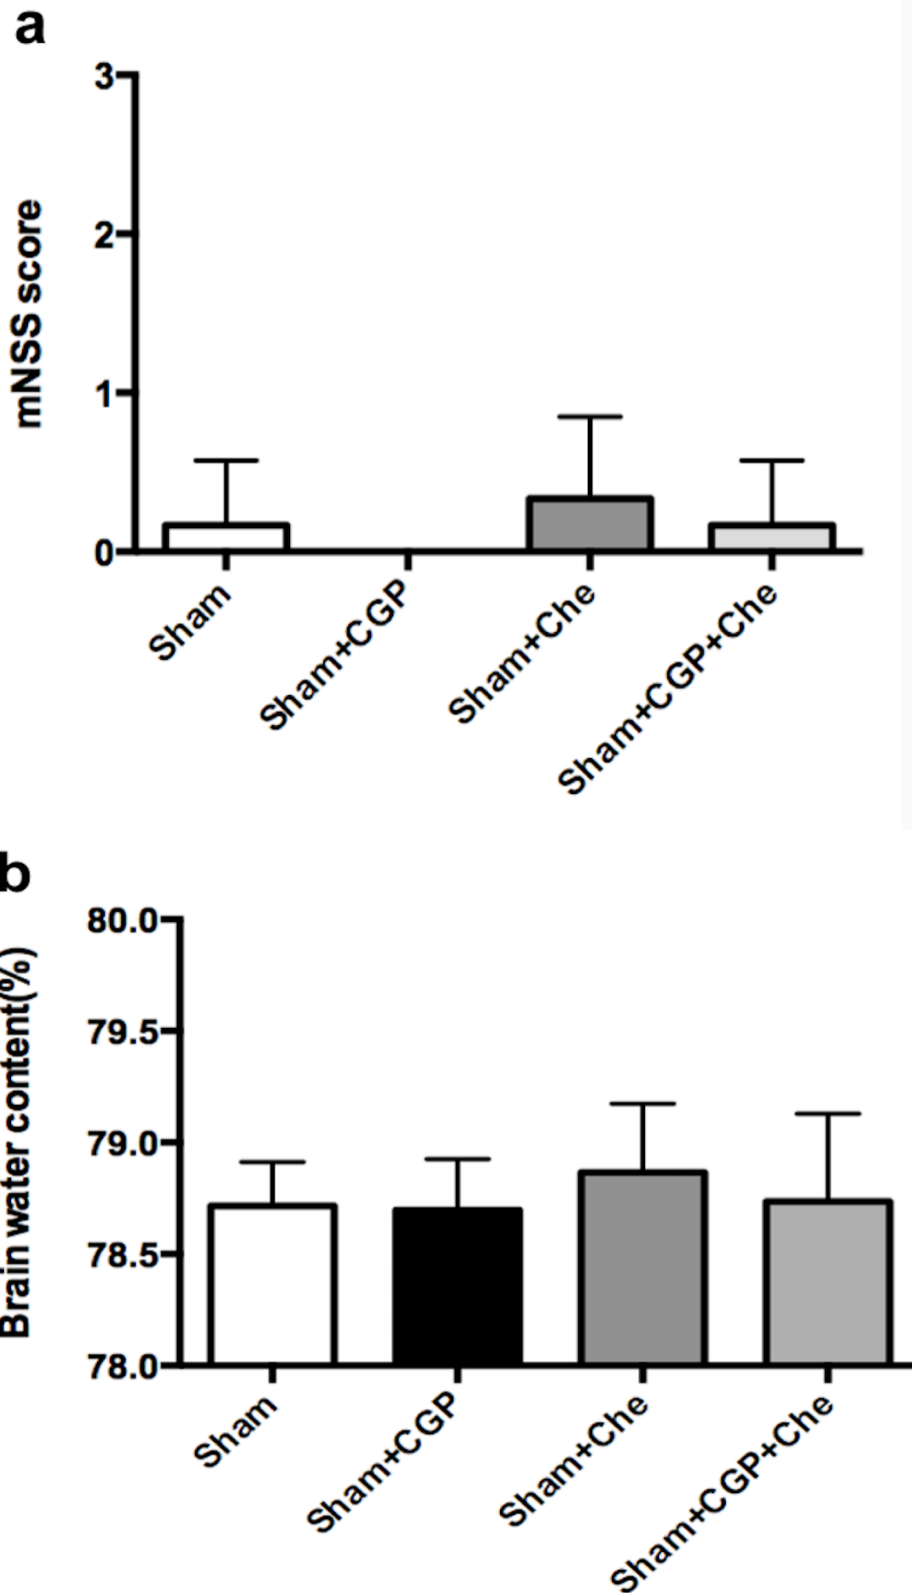

### Full-length gels for Figure 3

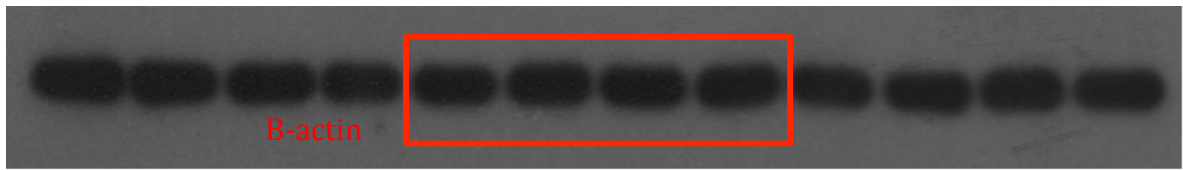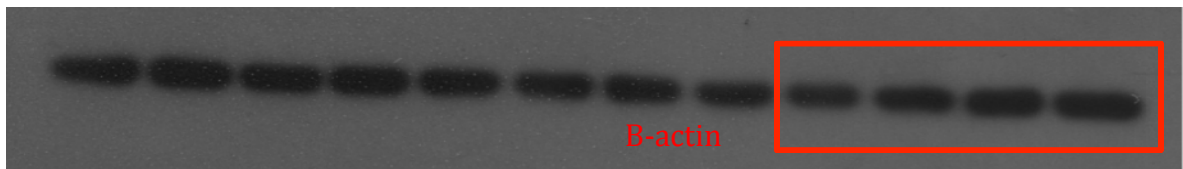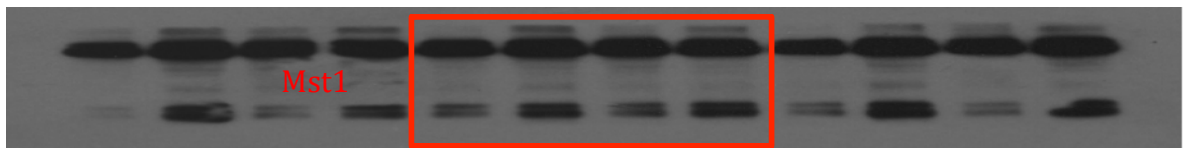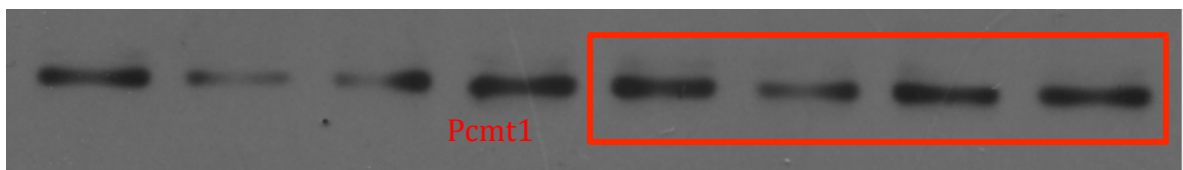

### Full-length gels for Figure 4

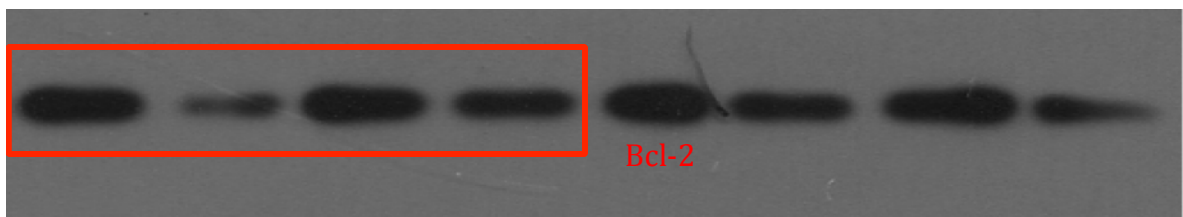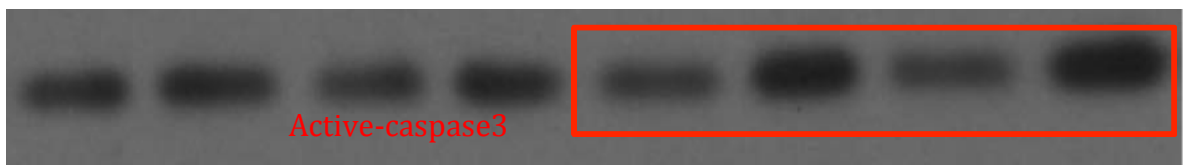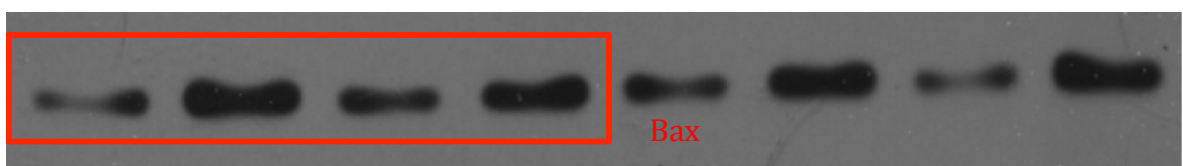

Supplement: 41598_2017_8196_MOESM1_ESM.pdf [file 41598_2017_8196_MOESM1_ESM.pdf]
